# Supplementary material
Source: Springer Nature journal article supplement (https://www.springermedizin.de/resource/supplementary/12885_2011_2729_MOESM3_ESM.pdf/9461788)

**A**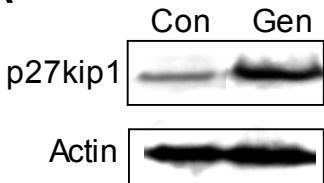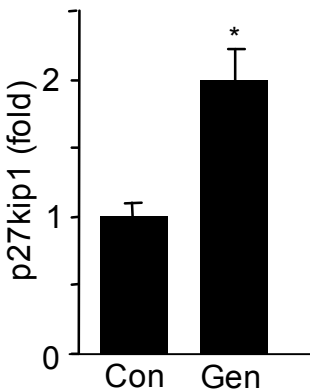**B**

ChIP

IP: FOXO3,

PCR: p27kip1 (-110 bp)

| Gen | - | - | + | + |
|-----|---|---|---|---|
| EGF | - | + | - | + |

p27kip1

Input

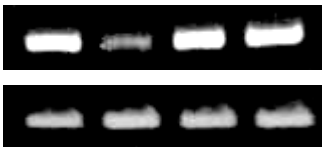

Supplement: MOESM3 [file 9461788]
